# Supplementary material for: Effect of back pain and fatique on torque output and activation of trunk muscles during isometric axial rotation exertion
Source: eLife journal article supplement (doi:10.7554/elife.50095), 2000-01-01
Supplement: supp2 [file elife-50095-supp2-v1.pdf]

**Supplementary Table 2: Description of Parameter Values**

| Parameter | Description                                                                                            | Value(s)            | References  |
|-----------|--------------------------------------------------------------------------------------------------------|---------------------|-------------|
| $g_1$     | Input of <i>S. mansoni</i> miracidia                                                                   | 500-10000 /week     | (a)         |
| $g_2$     | Input of <i>C. sukari</i> miracidia                                                                    | 150000-250000 /week | (a)         |
| $e_1$     | Exposure rate of sink snails to <i>S. mansoni</i> miracidia                                            | 0.06/week           | (a)         |
| $e_2$     | Exposure rate of juvenile <i>Biomphalaria</i> snails to <i>S. mansoni</i> miracidia                    | 0.18/week           | (a)         |
| $e_3$     | Exposure rate of adult <i>Biomphalaria</i> snails to <i>S. mansoni</i> miracidia                       | 0.18/week           | (a)         |
| $e_4$     | Exposure rate of sink snails to <i>C. sukari</i> miracidia                                             | 0.06/week           | (a)         |
| $e_5$     | Exposure rate of juvenile <i>Biomphalaria</i> snails to <i>C. sukari</i> miracidia                     | 0.18/week           | (a)         |
| $e_6$     | Exposure rate of adult <i>Biomphalaria</i> snails to <i>C. sukari</i> miracidia                        | 0.18/week           | (a)         |
| $e_7$     | Exposure rate of juvenile <i>Biomphalaria</i> snails to simultaneous infection                         | 0.0018/week         | (a)         |
| $e_8$     | Exposure rate of adult <i>Biomphalaria</i> snails to simultaneous infection                            | 0.0018/week         | (a)         |
| $1/y_1$   | Prepatent period for <i>S. mansoni</i> infection                                                       | 4.5 weeks           | (1)         |
| $1/y_2$   | Prepatent period for <i>C. sukari</i> infection                                                        | 4 weeks             | (b)         |
| $1/c_1$   | Time until <i>Biomphalaria</i> castration with <i>S. mansoni</i> only infection                        | 6 weeks             | (2)         |
| $1/c_2$   | Time until <i>Biomphalaria</i> castration with <i>C. sukari</i> only infection                         | 4 weeks             | (b)         |
| $1/c_3$   | Time until <i>Biomphalaria</i> castration with dual infection                                          | 4 weeks             | (b)         |
| $f_1$     | Fecundity per susceptible sink snail                                                                   | 14 eggs/week        | (2,3,4,5,6) |
| $f_2$     | Fecundity per susceptible <i>Biomphalaria</i> snail                                                    | 20-3 eggs/week      | (8,3,7,2,5) |
| $f_3$     | Fecundity per adult <i>Biomphalaria</i> exposed or infected with <i>S. mansoni</i> or <i>C. sukari</i> | 4.77 eggs/week      | (3,4,7,2,5) |
| $1/a_1$   | Duration of juvenile stage for susceptible <i>Biomphalaria</i>                                         | 7 weeks             | (9,10,11)   |
| $1/a_2$   | Duration of juvenile stage for <i>Biomphalaria</i> exposed or infected with <i>S. mansoni</i>          | 9.8 weeks           | (9,10,11)   |
| $1/a_3$   | Duration of juvenile stage for <i>Biomphalaria</i> exposed or infected with <i>C. sukari</i>           | 9.8-15 weeks        | (9,10,11)   |
| $1/a_4$   | Duration of juvenile stage for simultaneously infected <i>Biomphalaria</i>                             | 9.8-15 weeks        | (9,10,11)   |
| $1/d_1$   | Lifespan of <i>S. mansoni</i> or <i>C. sukari</i> miracidia                                            | 4-16 hours          | (9,12)      |
| $d_2$     | Mortality rate of susceptible snails                                                                   | 1/18.2 /week        | (9,12)      |
| $d_3$     | Mortality rate of exposed or infected snails                                                           | 1/8.1 /week         | (8)         |
| $1/d_4$   | Lifespan of <i>S. mansoni</i> or <i>C. sukari</i> cercariae                                            | 8-20 hours          | (13)        |
| $w$       | Liters of water in the environment                                                                     | 4180                | (c)         |
| $m_1$     | Maximum number of <i>Biomphalaria</i> in the environment                                               | 2000                | (c)         |
| $m_2$     | Maximum number of sink snails in the environment                                                       | 500                 | c           |

| Parameter | Description                                                  | Value(s)  | References |
|-----------|--------------------------------------------------------------|-----------|------------|
| $u_1$     | Rate of uptake of <i>S. mansoni</i> cercariae by humans      | .5% /week | a          |
| $u_2$     | Rate of uptake of <i>C. sukari</i> cercariae by humans       | .5% /week | a          |
| $s_1$     | Rate of <i>S. mansoni</i> cercarial shedding for $I_{jSm}$   | 4125/week | (7,10)     |
| $s_2$     | Rate of <i>S. mansoni</i> cercarial shedding for $I_{aSm}$   | 5100/week | (b)        |
| $s_3$     | Rate of <i>S. mansoni</i> cercarial shedding for $I_{jSi}$   | 14/week   | (b)        |
| $s_4$     | Rate of <i>S. mansoni</i> cercarial shedding for $I_{jSmCs}$ | 10/week   | (b)        |
| $s_5$     | Rate of <i>S. mansoni</i> cercarial shedding for $I_{aSmCs}$ | 10/week   | (b)        |
| $s_6$     | Rate of <i>S. mansoni</i> cercarial shedding for $I_{jCsSm}$ | 7/week    | (b)        |
| $s_7$     | Rate of <i>S. mansoni</i> cercarial shedding for $I_{aCsSm}$ | 7/week    | (b)        |
| $s_8$     | Rate of <i>S. mansoni</i> cercarial shedding for $I_{aSi}$   | 5100/week | (b)        |
| $s_9$     | Rate of <i>S. mansoni</i> cercarial shedding for $I_{cSm}$   | 140/week  | (b)        |
| $s_{10}$  | Rate of <i>S. mansoni</i> cercarial shedding for $I_{cSi}$   | 140/week  | (b)        |
| $s_{11}$  | Rate of <i>S. mansoni</i> cercarial shedding for $I_{cSmCs}$ | 14/week   | (b)        |
| $s_{12}$  | Rate of <i>S. mansoni</i> cercarial shedding for $I_{cCsSm}$ | 10/week   | (b)        |
| $s_{13}$  | Rate of <i>C. sukari</i> cercarial shedding for $I_{jCs}$    | 10/week   | (b)        |
| $s_{14}$  | Rate of <i>C. sukari</i> cercarial shedding for $I_{aCs}$    | 5.6/week  | (b)        |
| $s_{15}$  | Rate of <i>C. sukari</i> cercarial shedding for $I_{jSi}$    | 5.6/week  | (b)        |
| $s_{16}$  | Rate of <i>C. sukari</i> cercarial shedding for $I_{jSmCs}$  | 140/week  | (b)        |
| $s_{17}$  | Rate of <i>C. sukari</i> cercarial shedding for $I_{aSmCs}$  | 140/week  | (b)        |
| $s_{18}$  | Rate of <i>C. sukari</i> cercarial shedding for $I_{jCsSm}$  | 280/week  | (b)        |
| $s_{19}$  | Rate of <i>C. sukari</i> cercarial shedding for $I_{aCsSm}$  | 280/week  | (b)        |
| $s_{20}$  | Rate of <i>C. sukari</i> cercarial shedding for $I_{aSi}$    | 140/week  | (b)        |
| $s_{21}$  | Rate of <i>C. sukari</i> cercarial shedding for $I_{cCs}$    | 140/week  | (b)        |
| $s_{22}$  | Rate of <i>C. sukari</i> cercarial shedding for $I_{cSi}$    | 140/week  | (b)        |
| $s_{23}$  | Rate of <i>C. sukari</i> cercarial shedding for $I_{cSmCs}$  | 140/week  | (b)        |
| $s_{24}$  | Rate of <i>C. sukari</i> cercarial shedding for $I_{cCsSm}$  | 140/week  | (b)        |

(a) Parameters calibrated from prevalence data; (b) Parameters estimated directly from laboratory experiments; (c) Parameters estimated directly from field data.

1. Cooper, L. A., Ramani, S. K., Martin, A. E., Richards, C. S., Fred, A., Cooper, L. A Lewis, F. A. (1992). *Schistosoma mansoni* Infections in Neonatal *Biomphalaria glabrata* Snails. *Journal of Parasitology*, 78(3), 441 – 446.
2. Crews, A. E., Yoshino, T. P. (1989). *Schistosoma mansoni*: Effect of Infection on Reproduction and Gonadal Growth in *Biomphalaria glabrata*. *Experimental Parasitology*, 68, 326 – 334.
3. Costa, M. F. F. D. L., Rocha, R. S., Filho, P. C., Katz, N. (1993). A 13-year follow-up of treatment

- and snail control in an area endemic for *Schistosoma mansoni* in Brazil?: incidence of infection and reinfection. *Bulletin of the World Health Organization*, 71(2), 197 – 205.
4. Anderson, R. M., Crombie, J. (1984). Experimental studies of age-prevalence curves for *Schistosoma mansoni* infections in populations of *Biomphalaria glabrata*. *Parasitology*, 89, 79 –104.
  5. Costa, M. J. F. S., Gault, C. E., Confalonieri, U. E. C. (2004). COMPARATIVE STUDY OF THE FECUNDITY AND FERTILITY OF *Biomphalaria glabrata* ( Say , 1818 ) AND *Biomphalaria straminea* ( Dunker , 1848 ) IN A LABORATORY THROUGH SELF-FERTILIZATION AND CROSS-FERTILIZATION. *Revista Do Instituto de Medicina Tropical de So Paulo*, 46(3), 157 –163.
  6. Woolhouse, M. E. (1989). The effect of schistosome infection on the mortality rates of *Bulinus globosus* and *Biomphalaria pfeifferi*. *Annals of Tropical Medicine and Parasitology*, 83(2), 137– 141.
  7. Gerard, C., Theron, A. (1997). Age/Size and Time Specific Effects of *Schistosoma mansoni* on Energy Allocation Patterns of Its Sail Host *Biomphalaria glabrata*. *Oecologia*, 112(4), 447– 452.
  8. Theron, A., Rognon, A., Pages, J.-R. (1998). Host choice by larval parasites?: a study of *Biomphalaria glabrata* snails and *Schistosoma mansoni* miracidia related to host size. *Parasitology Research*, 84, 727–732.
  9. Toledo R, Fried B. 2011. *Biomphalaria* Snails and Larval Trematodes. Springer-Verlag.
  10. Anderson R, May RM. 1991. *Infectious diseases of humans: dynamics and control*. Oxford University Press
  11. Faro, J. M., Perazzini, M., dos Reis Corra, L., Mello-Silva, C. C., Pinheiro, J., Mota, E. M., ? Maldonado, A. (2013). Biological , biochemical and histopathological features related to parasitic

castration of *Biomphalaria glabrata* infected by *Schistosoma mansoni*. *Experimental Parasitology*, 134(2), 228–234.

12. Niemann, G. M., Lewis, F. A. (1990). *Schistosoma mansoni*: Influence of *Biomphalaria glabrata* size on susceptibility to infection and resultant cercarial production. *Experimental Parasitology*, 70, 286–292.

13. Chiyaka, E. T., Garira, W. (2009). Mathematical analysis of the transmission dynamics of schistosomiasis in the human-snail hosts. *Journal of Biological Systems*, 17(3), 397–423.
